# Supplementary material for: Penta-EF-Hand Protein Peflin Is a Negative Regulator of ER-To-Golgi Transport
Source: PubMed Central journal article supplement (PMC4898701; doi:10.1371/journal.pone.0157227), 2016-06-08
Supplement: pone.0157227.s001.pdf [file pone.0157227.s001.pdf]

**A**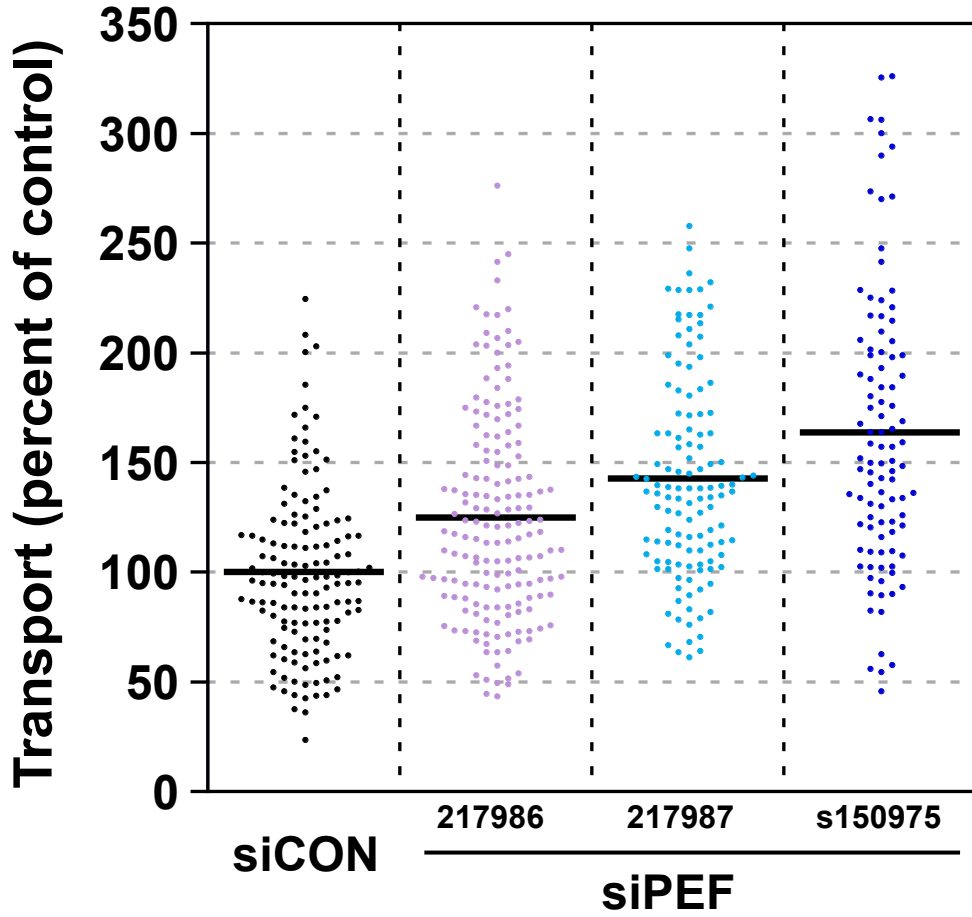**B**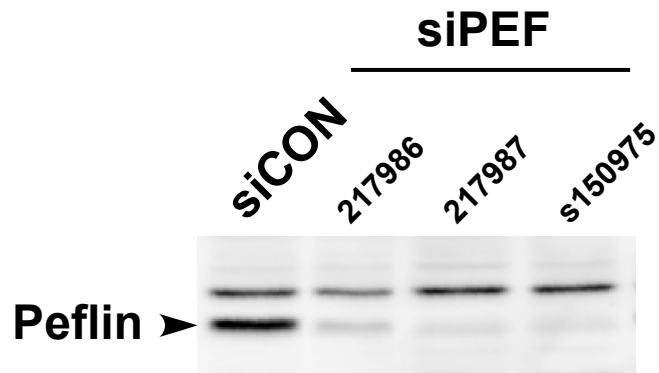**S1 Fig.**
